# Supplementary material for: Information Seeking Behavior on Covid-19 Vaccine among Residents of Fagge Local Government Area of Kano, Nigeria
Source: Research Square preprint supplement (doi:10.21203/rs.3.rs-1898209/v1), 2022-08-05
Supplement: Supplementary file 1 [file f1f272dd6dec33a759734e98.docx]

**
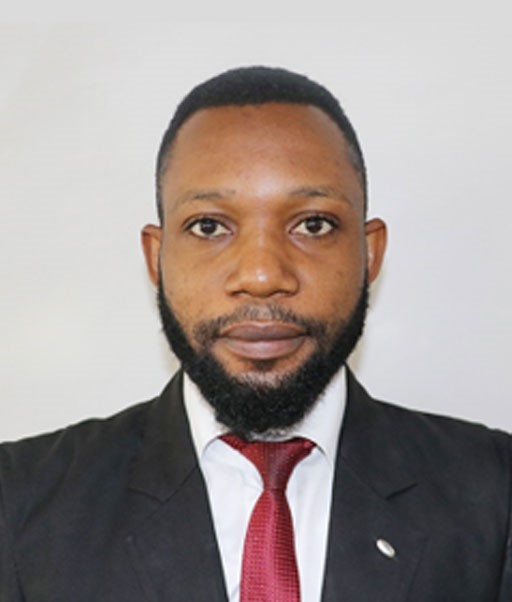
**

**Aondover Eric Msughter** is an academic staff in the Department of Mass Communication, Skyline University Nigeria. Msughter is a Doctoral student at BUK and a communication scholar with a specialization in Journalism and Media Studies. He obtained a Master of Science Degree (M.Sc) in Mass Communication from Bayero University, Kano, and a Bachelor of Science Degree (B.Sc) in Mass Communication from the same University. He has published papers in several national and international scholarly journals and attended and participated in several conferences and workshops on communication, media, and journalism. He is a member of the Association of Communication Scholars & Professionals of Nigeria (ACSPN), African Council for Communication Education (ACCE), and Fellow of Social Science Research Council (FSSRC), USA and an Award Winner of Campus Journalism as “Syndicated Writer”, 2018 and “Book Author”, 2019.

His research interest includes journalism and media studies, political communication, media and society, development communication, media and gender, health communication, and new media. He teaches courses like Foundation of Communication Research, Feature Writing and Reporting, Fundamentals of Journalism, History of Nigerian Mass Media, Science and Technology Reporting, Specialized Reporting, Critical and Reviewing Writing, and Writing for the Mass Media.

He featured prominently in the following newspapers: *Daily Trust, The Guardian, The Sun, The Punch, The Nation, Vanguard, Nigerian Tribune, NewsDigest and Blueprint* newspaper. He is the author of the following textbooks: Fundamentals of Media English (2022), Media Law and Ethics in Nigeria: Issues, Principles and Practices (2021), *Contemporary Approach to Social Science Research* (2020), *A Prescriptive Approach to Development Communication* (2020), *Fundamentals of Mass Media and Communication Research* (2018), *Selected Themes in Specialized Reporting* (2018), *A Prescriptive Approach of Peace Journalism and Development* (2018), *Understanding Safety and Protection in Nigeria’s Journalism* (2017), *The Ghost Gun* (2015), *Tears of Destiny* (2012) and many more. He is currently the Editor of MedDocs Publishers LLC, USA, and the Guest Editor of Science Publishing Group (PG), New York, USA as well as Reviewer/Editor of Academia Scholarly Journals. This is a few, of the pedigree of Mr. Aondover Eric Msughter.
